# Supplementary material
Source: PubMed Central journal article supplement (PMC1994572)
Supplement: NIHMS26134-supplement-03.pdf [file NIHMS26134-supplement-03.pdf]

## Supplemental Table 1

| Strain                                     | Genotype                                                                                       | Source                 |
|--------------------------------------------|------------------------------------------------------------------------------------------------|------------------------|
| MCY5326 wild type                          | <i>MATa his3Δ leu2Δ ura3Δ</i>                                                                  | Vyas et al. (2005)     |
| MCY5338 ( <i>msn2Δmsn4Δ</i> )              | <i>MATa his3Δ leu2Δ ura3Δ<br/>msn2Δ::kanMX6 msn4Δ::natMX4</i>                                  | Vyas et al. (2005)     |
| MCY5378 ( <i>nrg1Δnrg2Δ</i> )              | <i>MATa his3Δ leu2Δ ura3Δ<br/>nrg1Δ::hphMX4 nrg2Δ::his3MX6</i>                                 | Vyas et al. (2005)     |
| MCY5385<br>( <i>msn2Δmsn4Δnrg1Δnrg2Δ</i> ) | <i>MATa his3Δ leu2Δ ura3Δ<br/>msn2Δ::kanMX6 msn4Δ::natMX4<br/>nrg1Δ::hphMX4 nrg2Δ::his3MX6</i> | Vyas et al. (2005)     |
| Σ1278 <i>bflo11::lacZ</i>                  | <i>MATα ura3-52 trp1::hisG leu2::hisG<br/>his3::hisG flo11::lacZ-HIS3</i>                      | van Dyk et al., (2004) |
| BY4742 wild type                           | <i>MATα his3 leu2 ura3 lys2</i>                                                                | Euroscarf              |
| <i>ras2Δ</i>                               | <i>MATα his3 leu2 ura3 lys2<br/>ras2::kanMX4</i>                                               | Euroscarf              |
| <i>tpk1Δ</i>                               | <i>MATα his3 leu2 ura3 lys2<br/>tpk1::kanMX4</i>                                               | Euroscarf              |
| <i>tpk2Δ</i>                               | <i>MATα his3 leu2 ura3 lys2<br/>tpk2::kanMX4</i>                                               | Euroscarf              |
| <i>tpk3Δ</i>                               | <i>MATα his3 leu2 ura3 lys2<br/>tpk3::kanMX4</i>                                               | Euroscarf              |
| <i>snf1Δ</i>                               | <i>MATα his3 leu2 ura3 lys2<br/>snf1::kanMX4</i>                                               | Euroscarf              |
| <i>snf4Δ</i>                               | <i>MATα his3 leu2 ura3 lys2<br/>snf4::kanMX4</i>                                               | Euroscarf              |
| <i>sip3Δ</i>                               | <i>MATα his3 leu2 ura3 lys2<br/>sip3::kanMX4</i>                                               | Euroscarf              |
| <i>sip1Δ</i>                               | <i>MATα his3 leu2 ura3 lys2<br/>sip1::kanMX4</i>                                               | Euroscarf              |
| <i>gal83Δ</i>                              | <i>MATα his3 leu2 ura3 lys2<br/>gal83::kanMX4</i>                                              | Euroscarf              |
| <i>sak1Δ</i>                               | <i>MATα his3 leu2 ura3 lys2<br/>sak1::kanMX4</i>                                               | Euroscarf              |
| <i>msn2Δ</i>                               | <i>MATα his3 leu2 ura3 lys2<br/>msn2::kanMX4</i>                                               | Euroscarf              |
| <i>msn4Δ</i>                               | <i>MATα his3 leu2 ura3 lys2<br/>msn4::kanMX4</i>                                               | Euroscarf              |
| <i>nrg1Δ</i>                               | <i>MATα his3 leu2 ura3 lys2<br/>nrg1::kanMX4</i>                                               | Euroscarf              |
| <i>nrg2Δ</i>                               | <i>MATα his3 leu2 ura3 lys2<br/>nrg2::kanMX4</i>                                               | Euroscarf              |
