# Supplementary material
Source: PubMed Central journal article supplement (PMC1994572)
Supplement: NIHMS26134-supplement-04.pdf [file NIHMS26134-supplement-04.pdf]

## **Supplemental Table 2**

| <b>Primer</b>                                                                                                                         | <b>Sequence</b>                                                                                          |
|---------------------------------------------------------------------------------------------------------------------------------------|----------------------------------------------------------------------------------------------------------|
| <b>Primers for Cloning <i>IZH2</i> into 3xHA expression vector</b>                                                                    |                                                                                                          |
| <b>To replace <i>ZRC1</i> with <i>IZH2</i></b>                                                                                        |                                                                                                          |
| Forward<br>Uppercase is complementary to the pFL38 vector<br>Lowercase is complementary to the <i>IZH2</i> promoter                   | 5' - TTT CCC AGT CAC GAC GTT GTA AAA CGA CGG CCA<br>GTG AAT Tat tgc tat cag cga tac taa - 3'             |
| Reverse<br>Uppercase is complementary to the 3xHA epitope<br>Lowercase is complementary to the <i>IZH2</i> open reading frame         | 5' - GTC ATA GGG ATA GCC CGC ATA GTC AGG AAC ATC<br>GTA TGG GTa gga gac aat ccc gtt ctc - 3'             |
| <b>To replace <i>IZH2</i> promoter with <i>GALI</i></b>                                                                               |                                                                                                          |
| Forward<br>Uppercase is complementary to the pFL38 vector<br>Lowercase is complementary to the <i>GALI</i> promoter                   | TTT CCC AGT CAC GAC GTT GTA AAA CGA CGG CCA GTG<br>AAT Tga att cga cag gtt atc agc - 3'                  |
| Reverse<br>Uppercase is complementary to the <i>IZH2</i> open reading frame<br>Lowercase is complementary to the <i>GALI</i> promoter | 5' - GCT CTT GCA CAC TCT TAG TCC TTT CTA ATA AAG TTG<br>ACA Tgt cga cct cga gcg gga - 3'                 |
| <b>To clone <i>AdipoR1</i> into pYES260</b>                                                                                           |                                                                                                          |
| Forward<br>Uppercase is complementary to the pYES260 vector<br>Lowercase is complementary to the <i>AdipoR1</i> open reading frame    | 5' - GGT GGT GGC GAC CAT CAC GAG AAT CTT TAT<br>TTT CAG GGC GAC atg tct tcc cac aaa gga tc - 3'          |
| Reverse<br>Uppercase is complementary to the pYES260 vector<br>Lowercase is complementary to the <i>AdipoR1</i> open reading frame    | 5' - ATA TCT GCA GAA TTC CAG CAC ACT GGC GGC<br>CGT TAC TAG TGG ATC Ctc aga gaa ggg tgt cat cag tac - 3' |
| <b>To clone <i>AdipoR1</i> into pYES260</b>                                                                                           |                                                                                                          |
| Forward<br>Uppercase is complementary to the pYES260 vector<br>Lowercase is complementary to the <i>AdipoR1</i> open reading frame    | 5' - GGT GGT GGC GAC CAT CAC GAG AAT CTT TAT<br>TTT CAG GGC GCC atg ggc atg tcc cct ctc tt - 3'          |
| Reverse<br>Uppercase is complementary to the pYES260 vector<br>Lowercase is complementary to the <i>AdipoR1</i> open reading frame    | 5' - ATA TCT GCA GAA TTC CAG CAC ACT GGC GGC<br>CGT TAC TAG TGG ATC Ttc aca gtg cat cct ctt cac tgc - 3' |
