# Supplementary material
Source: PubMed Central journal article supplement (PMC1994572)

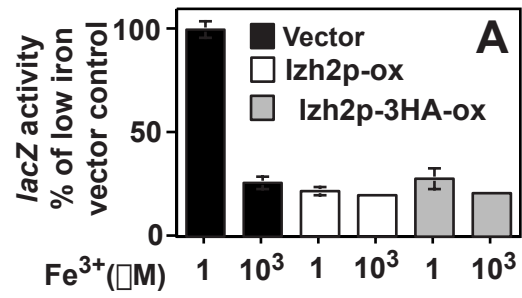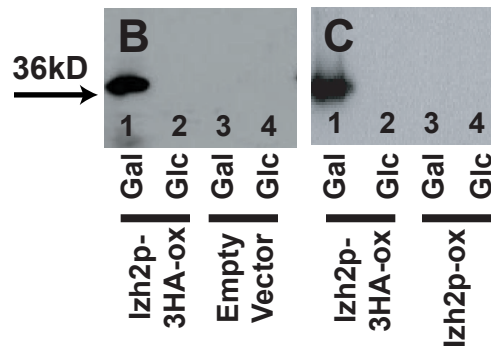

Supplement: NIHMS26134-supplement-01.pdf [file NIHMS26134-supplement-01.pdf]

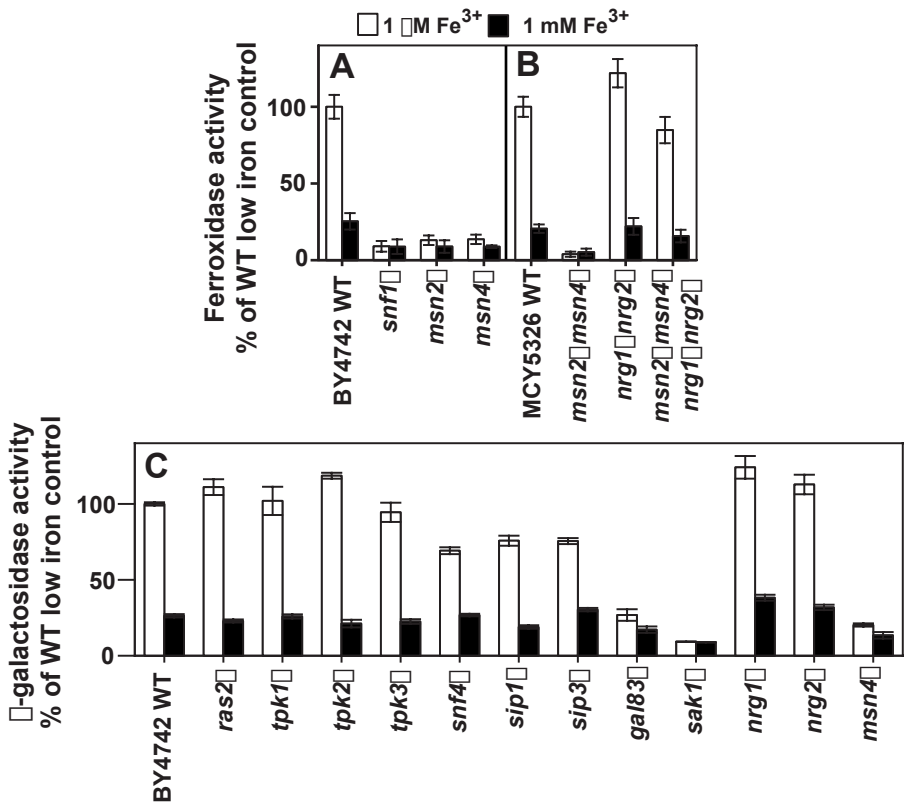

Supplement: NIHMS26134-supplement-02.pdf [file NIHMS26134-supplement-02.pdf]
